# Supplementary material for: Effects of alkyl chain length and anion size on thermal and structural properties for 1-alkyl-3-methylimidazolium hexafluorocomplex salts (CxMImAF6, x = 14, 16 and 18; A = P, As, Sb, Nb and Ta)
Source: Royal Society of Chemistry journal article supplement (doi:10.1039/c2dt11693f), 2012-01-01

## **SUPPORTING INFORMATION**

### **Effects of Alkyl Chain Length and Anion Size on Thermal and Structural Properties for 1-Alkyl-3-methylimidazolium Hexafluorocomplex Salts ( $C_x\text{MImAF}_6$ , $x = 14, 16$ , and $18$ ; $A = \text{P, As, Sb, Nb, and Ta}$ )**

**Fei Xu, Kazuhiko Matsumoto<sup>\*</sup>, Rika Hagiwara**

*Graduate School of Energy Science, Kyoto University, Yoshida, Sakyo-ku, Kyoto 606-8501, Japan*

<sup>\*</sup> Email: k-matsumoto@energy.kyoto-u.ac.jp

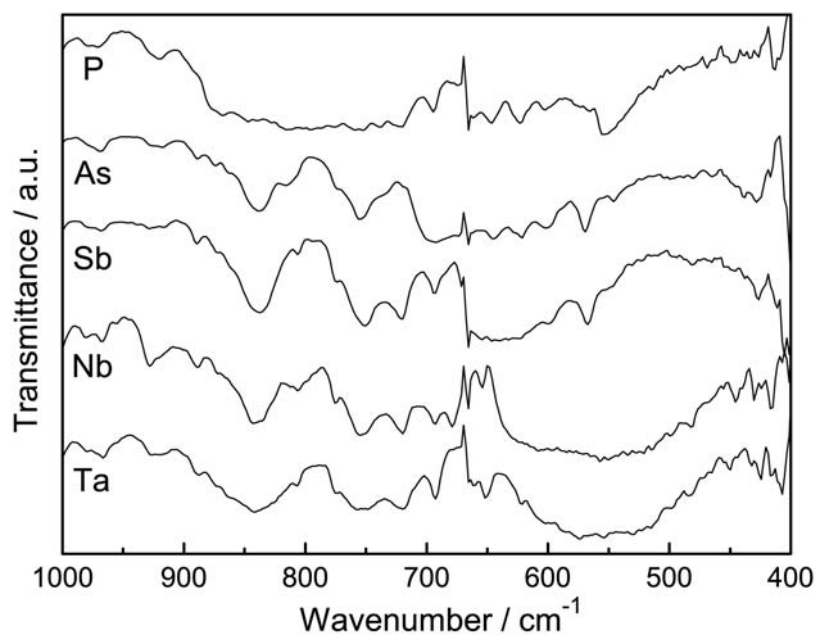

Figure S1 Infra-red spectra of  $C_{14}MImAF_6$  ( $A = P, As, Sb, Nb, \text{ and } Ta$ ).

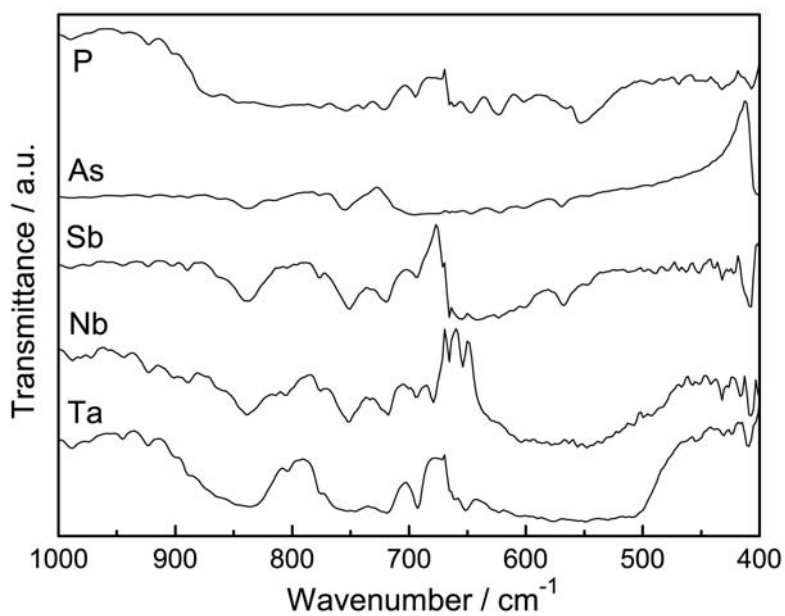

Figure S2 Infra-red spectra of  $C_{16}MImAF_6$  ( $A = P, As, Sb, Nb, \text{ and } Ta$ ).

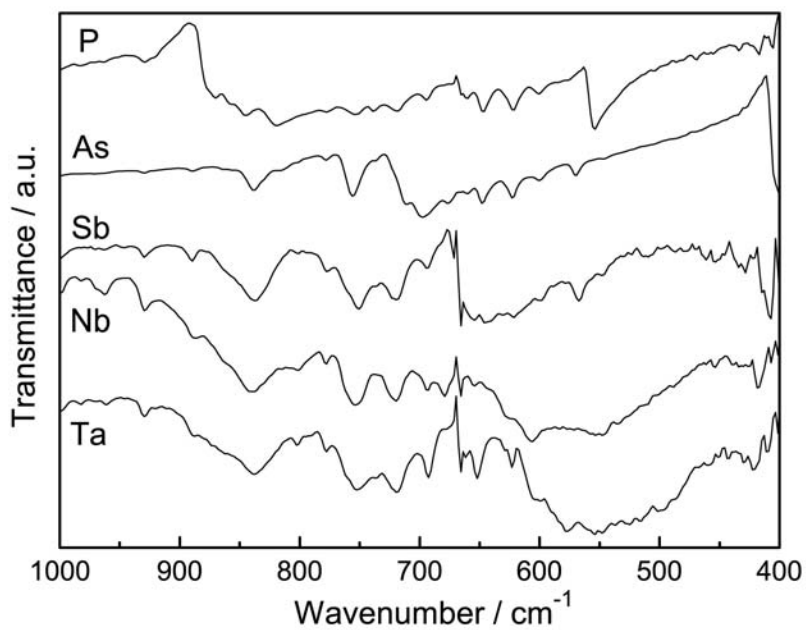

Figure S3 Infra-red spectra of  $C_{18}MImAF_6$  ( $A = P, As, Sb, Nb, \text{ and } Ta$ ).

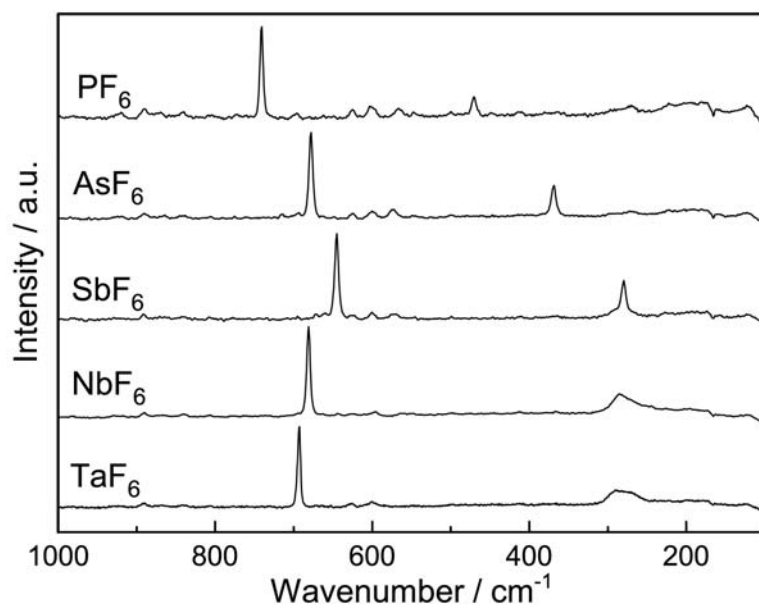

Figure S4 Raman spectra of  $C_{14}MImAF_6$  ( $A = P, As, Sb, Nb, \text{ and } Ta$ ).

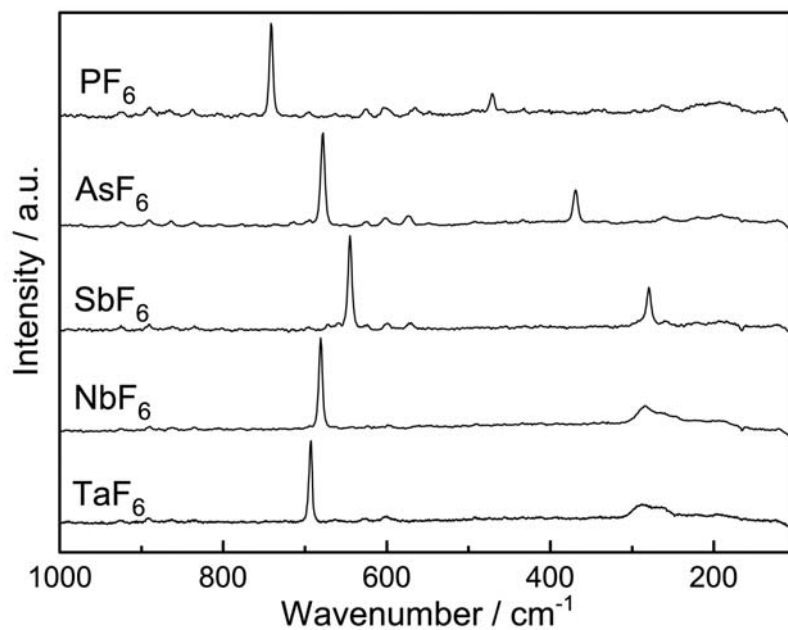

Figure S5 Raman spectra of  $\text{C}_{16}\text{MImAF}_6$  (A = P, As, Sb, Nb, and Ta).

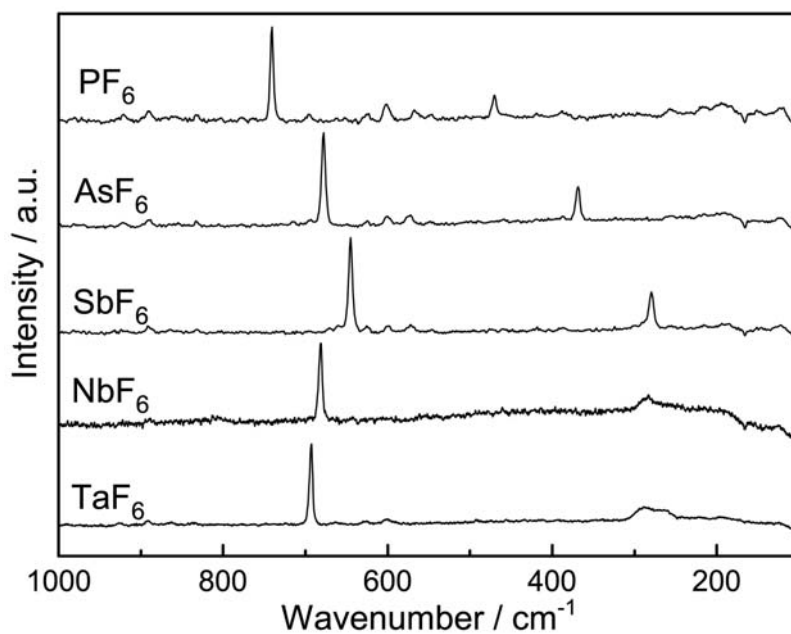

Figure S6 Raman spectra of  $\text{C}_{18}\text{MImAF}_6$  (A = P, As, Sb, Nb, and Ta).

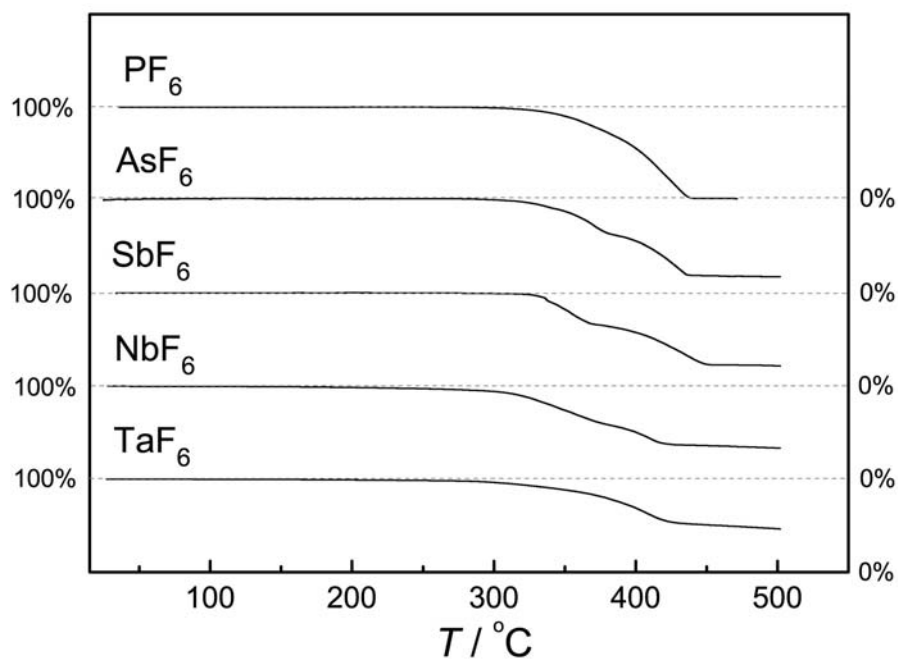

Figure S7 Thermogravimetric curves of  $C_{14}MImAF_6$  (A = P, As, Sb, Nb, and Ta).

The temperatures where the samples lose 10 % weight are 351.0  $^\circ C$  for  $C_{14}MImPF_6$ , 345.6  $^\circ C$  for  $C_{14}MImAsF_6$ , 340.5  $^\circ C$  for  $C_{14}MImSbF_6$ , 328.5  $^\circ C$  for  $C_{14}MImNbF_6$ , and 342.5  $^\circ C$  for  $C_{14}MImTaF_6$ .

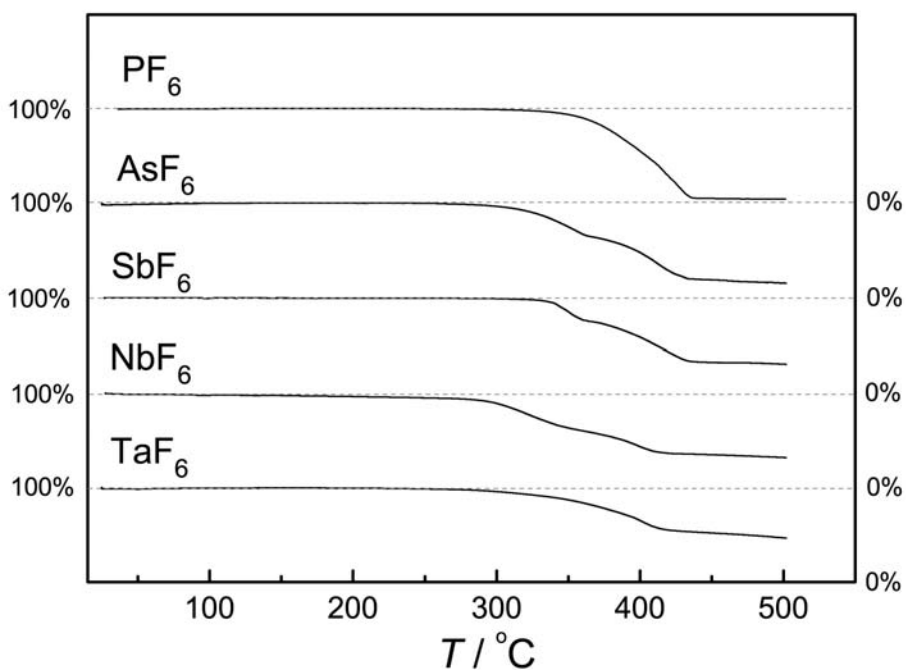

Figure S8 Thermogravimetric curves of  $C_{16}MImAF_6$  (A = P, As, Sb, Nb, and Ta).

The temperatures where the samples lose 10 % weight are 351.2 °C for  $C_{16}MImPF_6$ , 336.2 °C for  $C_{16}MImAsF_6$ , 345.2 °C for  $C_{16}MImSbF_6$ , 307.8 °C for  $C_{16}MImNbF_6$ , and 337.2 °C for  $C_{16}MImTaF_6$ .

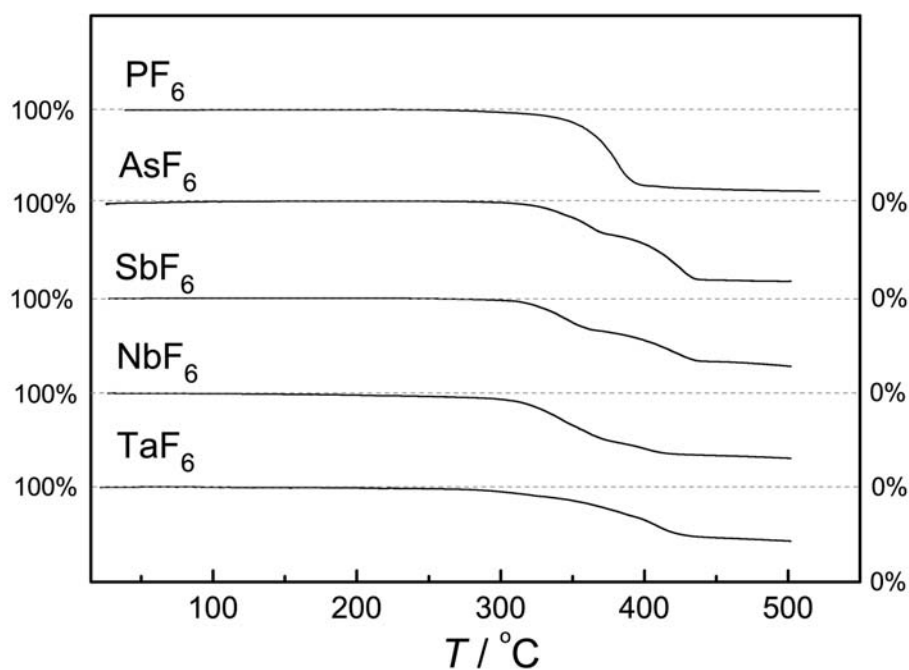

Figure S9 Thermogravimetric curves of  $C_{18}MImAF_6$  (A = P, As, Sb, Nb, and Ta).

The temperatures where the samples lose 10 % weight are 343.5 °C for  $C_{18}MImPF_6$ , 342.7 °C for  $C_{18}MImAsF_6$ , 329.3 °C for  $C_{18}MImSbF_6$ , 314.9 °C for  $C_{18}MImNbF_6$ , and 332.3 °C for  $C_{18}MImTaF_6$ .

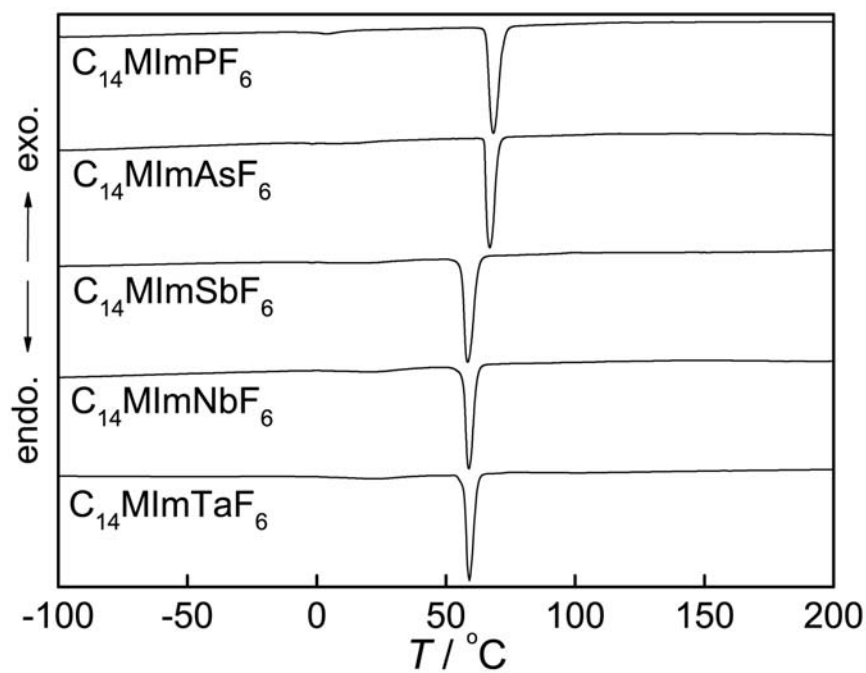

Figure S10 Differential scanning calorimetric curves (heating process) for  $C_{14}MImAF_6$  (A = P, As, Sb, Nb, and Ta).

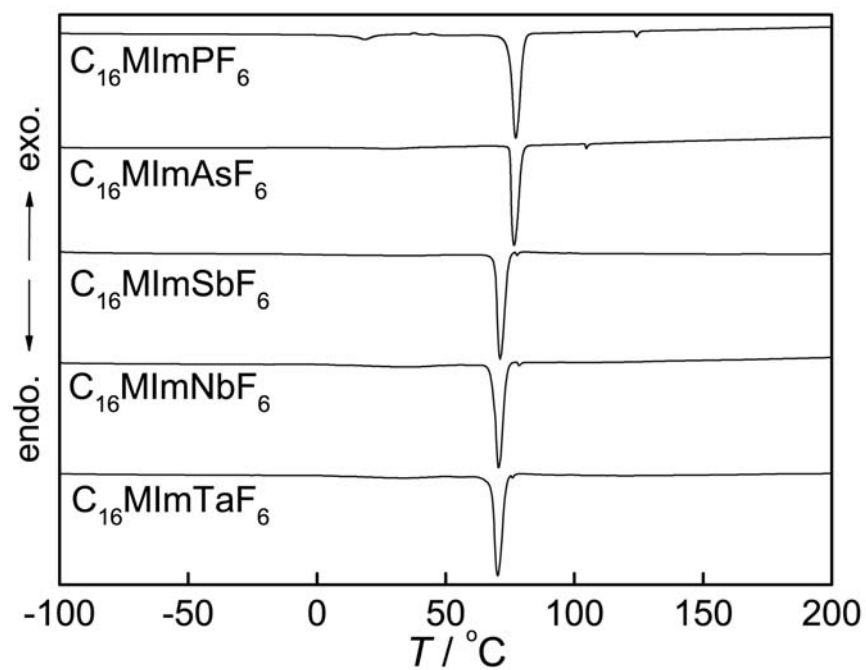

Figure S11 Differential scanning calorimetric curves (heating process) for  $C_{16}MImAF_6$  (A = P, As, Sb, Nb, and Ta).

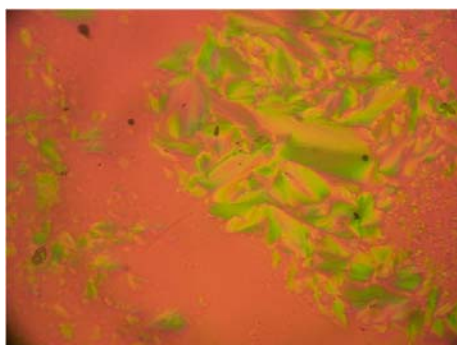

Figure S12 Polarized optical microscopic textures of  $C_{14}MImPF_6$  (67 °C).

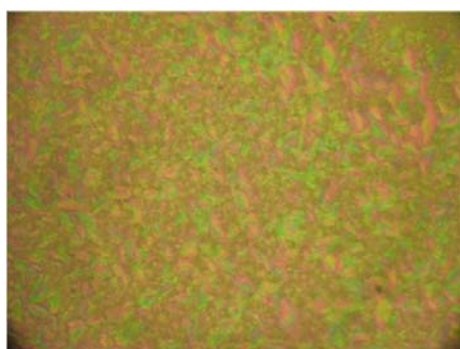

a

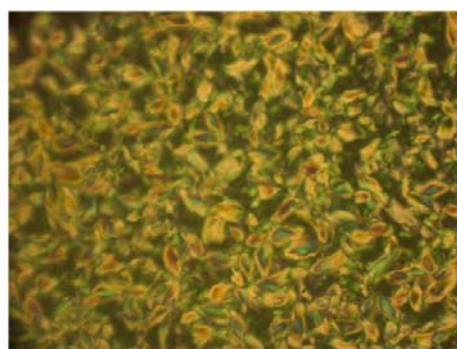

b

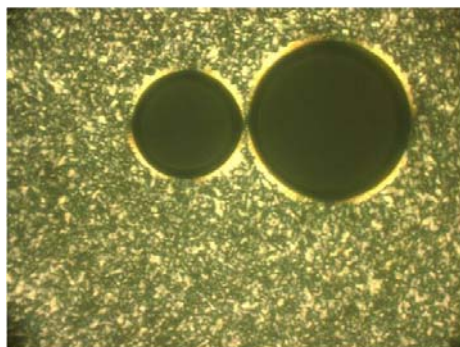

c

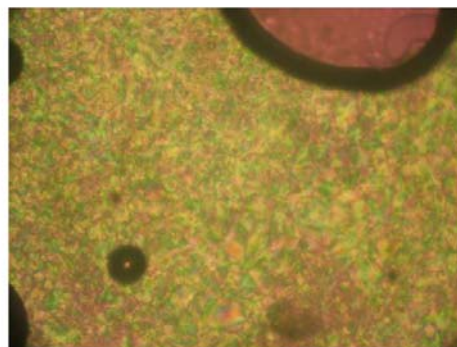

d

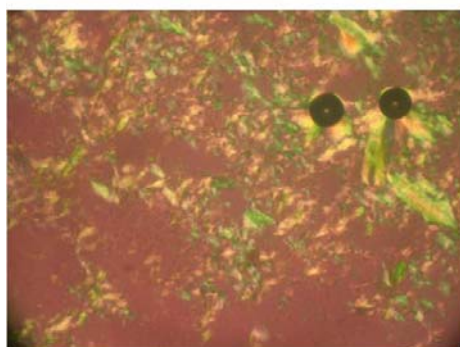

e

Figure S13 Polarized optical microscopic textures of (a)  $C_{16}MImPF_6$  at 100 °C, (b)  $C_{16}MImAsF_6$  at 100 °C, (c)  $C_{16}MImSbF_6$  at 68 °C, (d)  $C_{16}MImNbF_6$  at 70 °C, and  $C_{16}MImTaF_6$  at 70 °C.

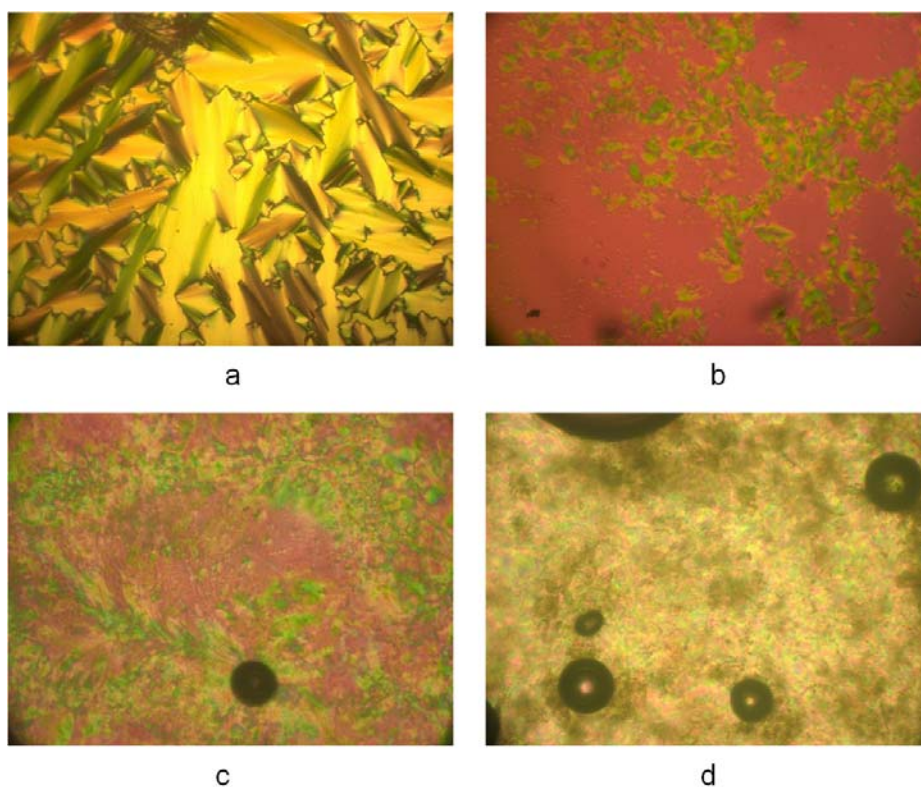

Figure S14 Polarized optical microscopic textures of (a)  $C_{18}MImPF_6$  at 100 °C, (b)  $C_{18}MImAsF_6$  at 100 °C, (c)  $C_{18}MImSbF_6$  at 100 °C, and (d)  $C_{18}MImNbF_6$  at 100 °C.

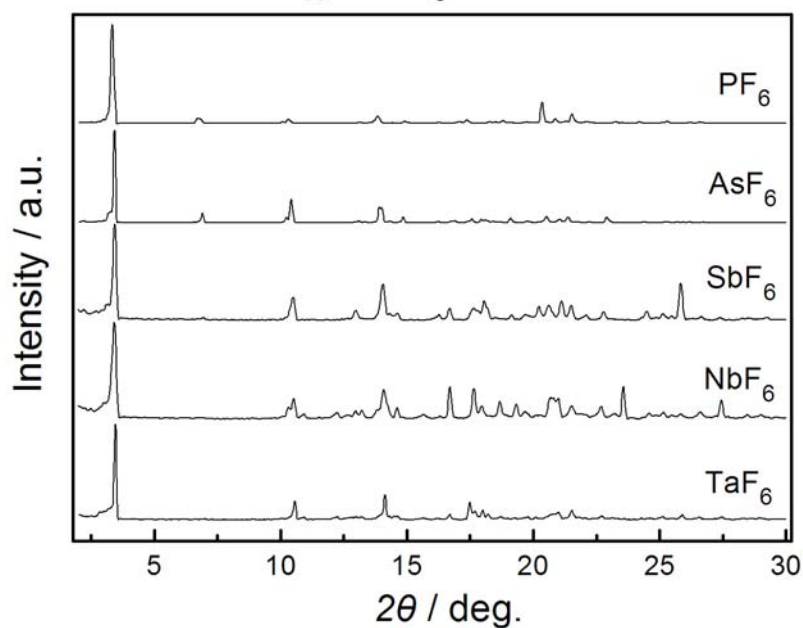

Figure S15 X-ray diffraction patterns ( $2^\circ < 2\theta < 30^\circ$ ) for  $\text{C}_{14}\text{MImAF}_6$  ( $A = \text{P, As, Sb, Nb, and Ta}$ ) in the crystalline phase at  $40^\circ\text{C}$ .

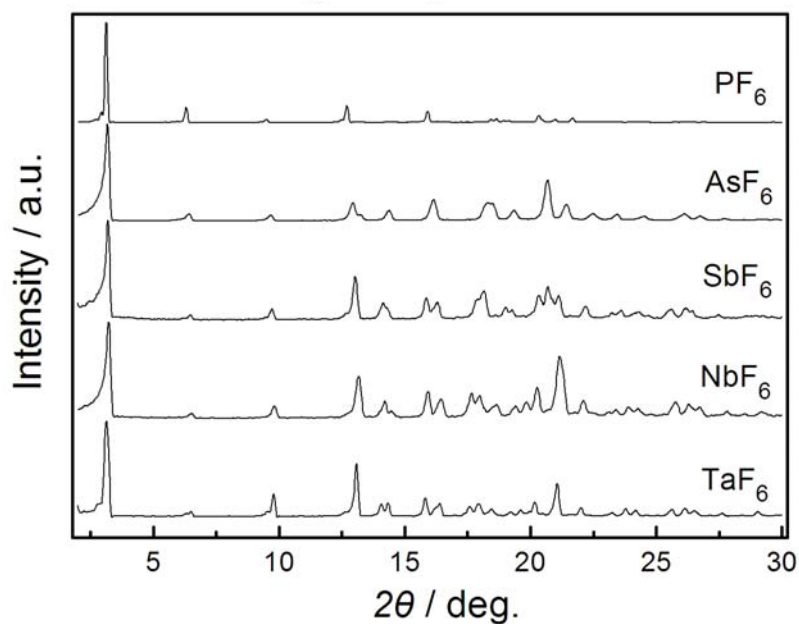

Figure S16 X-ray diffraction patterns ( $2^\circ < 2\theta < 30^\circ$ ) for  $\text{C}_{16}\text{MImAF}_6$  ( $A = \text{P, As, Sb, Nb, and Ta}$ ) in the crystalline phase at  $40^\circ\text{C}$ .

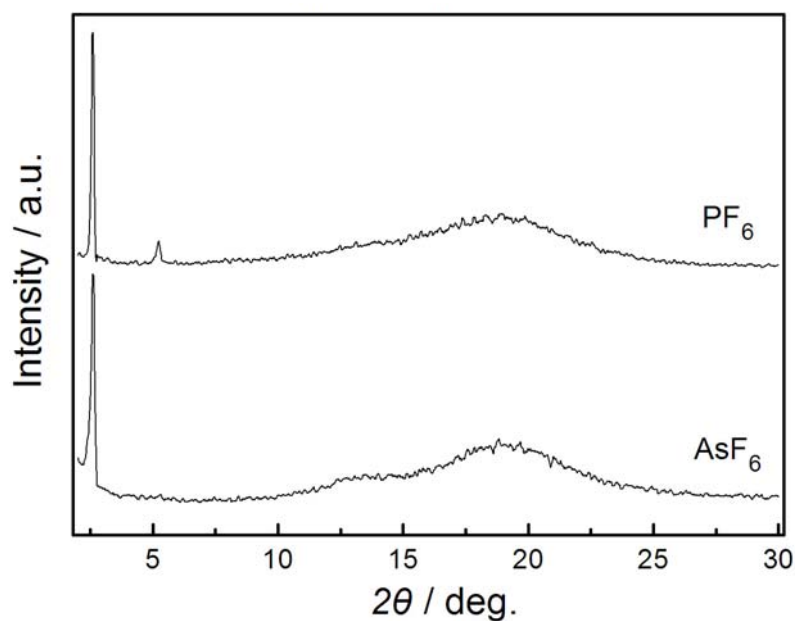

Figure S17 X-ray diffraction patterns ( $2^\circ < 2\theta < 30^\circ$ ) for  $C_{16}MImAF_6$  ( $A = P$  and  $As$ ) in the liquid crystalline mesophase at  $100^\circ C$ .

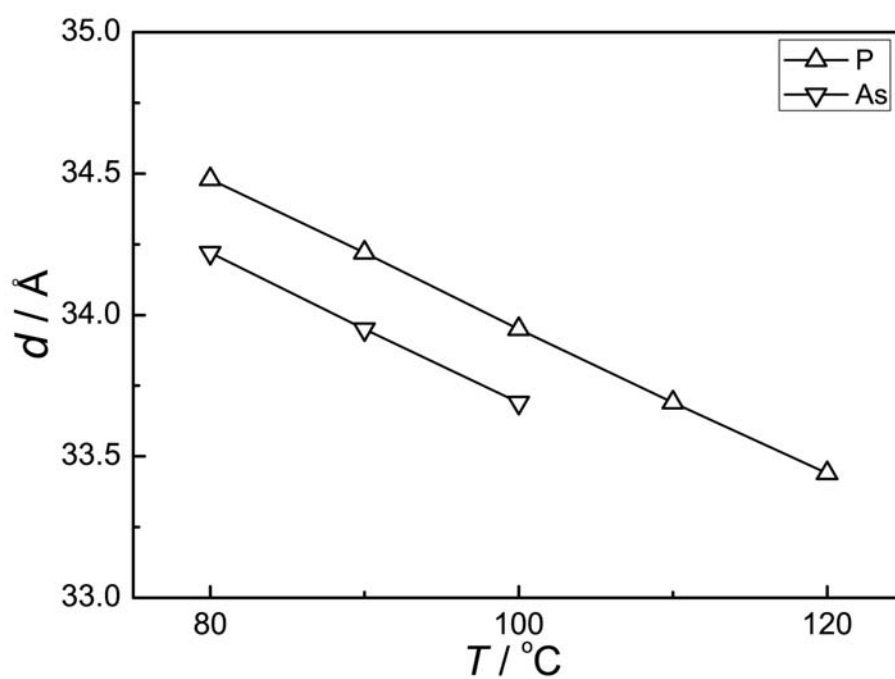

Figure S18 Layer spacings of  $C_{16}MImAF_6$  ( $A = P$  and  $As$ ) in the liquid crystalline mesophase.

Table S1      Summary of crystal data and refinement results for C<sub>18</sub>MImAF<sub>6</sub> (A = P, As, Sb, Nb, and Ta) at 25 °C.

|                                                                                   | P                                                               | As                                                               | Sb                                                               | Nb                                                               | Ta                                                               |
|-----------------------------------------------------------------------------------|-----------------------------------------------------------------|------------------------------------------------------------------|------------------------------------------------------------------|------------------------------------------------------------------|------------------------------------------------------------------|
| formula                                                                           | C <sub>22</sub> H <sub>43</sub> N <sub>2</sub> F <sub>6</sub> P | C <sub>22</sub> H <sub>43</sub> N <sub>2</sub> F <sub>6</sub> As | C <sub>22</sub> H <sub>43</sub> N <sub>2</sub> F <sub>6</sub> Sb | C <sub>22</sub> H <sub>43</sub> N <sub>2</sub> F <sub>6</sub> Nb | C <sub>22</sub> H <sub>43</sub> N <sub>2</sub> F <sub>6</sub> Ta |
| fw                                                                                | 480.55                                                          | 524.50                                                           | 571.34                                                           | 542.49                                                           | 630.53                                                           |
| crystal color                                                                     | colorless                                                       | colorless                                                        | colorless                                                        | colorless                                                        | colorless                                                        |
| crystal size, mm                                                                  | 0.80×0.30×0.05                                                  | 0.70×0.20×0.05                                                   | 0.75×0.30×0.03                                                   | 0.70×0.30×0.05                                                   | 0.43×0.13×0.04                                                   |
| <i>T</i> /°C                                                                      | 25                                                              | 25                                                               | 25                                                               | 25                                                               | 25                                                               |
| crystal system                                                                    | monoclinic                                                      | monoclinic                                                       | monoclinic                                                       | monoclinic                                                       | monoclinic                                                       |
| space group                                                                       | <i>P</i> 2 <sub>1</sub> / <i>a</i>                              | <i>P</i> 2 <sub>1</sub> / <i>a</i>                               | <i>P</i> 2 <sub>1</sub> / <i>a</i>                               | <i>P</i> 2 <sub>1</sub> / <i>a</i>                               | <i>P</i> 2 <sub>1</sub> / <i>a</i>                               |
| <i>a</i> /Å                                                                       | 9.6506(16)                                                      | 9.5645(13)                                                       | 9.6973(7)                                                        | 9.5882(11)                                                       | 9.6813(8)                                                        |
| <i>b</i> /Å                                                                       | 9.5436(17)                                                      | 9.8620(15)                                                       | 9.9933(7)                                                        | 10.0041(14)                                                      | 10.0074(9)                                                       |
| <i>c</i> /Å                                                                       | 29.633(5)                                                       | 28.969(4)                                                        | 28.991(2)                                                        | 28.871(3)                                                        | 29.014(3)                                                        |
| <i>β</i> /°                                                                       | 92.169(4)                                                       | 94.400(3)                                                        | 95.2424(16)                                                      | 95.094(3)                                                        | 95.112(2)                                                        |
| <i>V</i> /Å <sup>3</sup>                                                          | 2727.3(8)                                                       | 2724.5(7)                                                        | 2797.8(3)                                                        | 2758.4(6)                                                        | 2799.8(4)                                                        |
| <i>Z</i>                                                                          | 4                                                               | 4                                                                | 4                                                                | 4                                                                | 4                                                                |
| <i>ρ</i> <sub>calcd</sub> /g cm <sup>−3</sup>                                     | 1.170                                                           | 1.279                                                            | 1.356                                                            | 1.306                                                            | 1.496                                                            |
| <i>F</i> (000)                                                                    | 1032                                                            | 1104                                                             | 1176                                                             | 1136                                                             | 1264                                                             |
| <i>μ</i> /mm <sup>−1</sup>                                                        | 0.152                                                           | 1.299                                                            | 1.036                                                            | 0.487                                                            | 3.976                                                            |
| <i>λ</i> /Å                                                                       | 0.71073                                                         | 0.71073                                                          | 0.71073                                                          | 0.71073                                                          | 0.71073                                                          |
| reflns collected/unique                                                           | 18736/4276                                                      | 20574/4779                                                       | 21577/4925                                                       | 21340/4855                                                       | 20501/4902                                                       |
| <i>R</i> <sub>1</sub> ( <i>F</i> <sub>o</sub> ) <sup><i>a</i></sup>               | 0.1039                                                          | 0.0886                                                           | 0.0500                                                           | 0.0885                                                           | 0.0469                                                           |
| <i>wR</i> <sub>2</sub> ( <i>F</i> <sub>o</sub> <sup>2</sup> ) <sup><i>b</i></sup> | 0.3062                                                          | 0.2720                                                           | 0.1514                                                           | 0.2576                                                           | 0.1136                                                           |
| <i>R</i> <sub>int</sub>                                                           | 0.0524                                                          | 0.0546                                                           | 0.0302                                                           | 0.0551                                                           | 0.0524                                                           |

<sup>*a*</sup> *R*<sub>1</sub> =  $\sum ||F_o| - |F_c|| / \sum |F_o|$  for *I* > 2σ(*I*). <sup>*b*</sup> *wR*<sub>2</sub> =  $\{\sum [w(F_o^2 - F_c^2)^2] / \sum [w(F_o^2)^2]\}^{1/2}$  for *I* > 2σ(*I*).

Table S2      Summary of crystal data and refinement results for C<sub>18</sub>MImAF<sub>6</sub> (A = P, As, Sb, Nb, and Ta) at 55 °C.

|                                                                                   | P                                                               | As                                                               | Sb                                                               | Nb                                                               | Ta                                                               |
|-----------------------------------------------------------------------------------|-----------------------------------------------------------------|------------------------------------------------------------------|------------------------------------------------------------------|------------------------------------------------------------------|------------------------------------------------------------------|
| formula                                                                           | C <sub>22</sub> H <sub>43</sub> N <sub>2</sub> F <sub>6</sub> P | C <sub>22</sub> H <sub>43</sub> N <sub>2</sub> F <sub>6</sub> As | C <sub>22</sub> H <sub>43</sub> N <sub>2</sub> F <sub>6</sub> Sb | C <sub>22</sub> H <sub>43</sub> N <sub>2</sub> F <sub>6</sub> Nb | C <sub>22</sub> H <sub>43</sub> N <sub>2</sub> F <sub>6</sub> Ta |
| fw                                                                                | 480.55                                                          | 524.50                                                           | 571.34                                                           | 542.49                                                           | 630.53                                                           |
| crystal color                                                                     | colorless                                                       | colorless                                                        | colorless                                                        | colorless                                                        | colorless                                                        |
| crystal size, mm                                                                  | 0.80×0.30×0.05                                                  | 0.70×0.20×0.05                                                   | 0.75×0.30×0.03                                                   | 0.70×0.30×0.05                                                   | 0.43×0.13×0.04                                                   |
| <i>T</i> /°C                                                                      | 55                                                              | 55                                                               | 55                                                               | 55                                                               | 55                                                               |
| crystal system                                                                    | monoclinic                                                      | monoclinic                                                       | monoclinic                                                       | monoclinic                                                       | monoclinic                                                       |
| space group                                                                       | <i>P</i> 2 <sub>1</sub> / <i>a</i>                              | <i>P</i> 2 <sub>1</sub> / <i>a</i>                               | <i>P</i> 2 <sub>1</sub> / <i>a</i>                               | <i>P</i> 2 <sub>1</sub> / <i>a</i>                               | <i>P</i> 2 <sub>1</sub> / <i>a</i>                               |
| <i>a</i> /Å                                                                       | 9.740(2)                                                        | 9.7983(11)                                                       | 9.9860(13)                                                       | 9.838(3)                                                         | 9.9490(10)                                                       |
| <i>b</i> /Å                                                                       | 9.526(2)                                                        | 9.6239(13)                                                       | 9.8314(14)                                                       | 9.772(3)                                                         | 9.7952(10)                                                       |
| <i>c</i> /Å                                                                       | 29.916(7)                                                       | 29.575(3)                                                        | 29.360(4)                                                        | 29.126(8)                                                        | 29.289(3)                                                        |
| <i>β</i> /°                                                                       | 90.578(5)                                                       | 91.6869(18)                                                      | 92.795(2)                                                        | 93.286(6)                                                        | 92.810(2)                                                        |
| <i>V</i> /Å <sup>3</sup>                                                          | 2775.5(11)                                                      | 2787.6(6)                                                        | 2879.0(7)                                                        | 2795.5(13)                                                       | 2850.9(5)                                                        |
| <i>Z</i>                                                                          | 4                                                               | 4                                                                | 4                                                                | 4                                                                | 4                                                                |
| <i>ρ</i> <sub>calcd</sub> /g cm <sup>−3</sup>                                     | 1.150                                                           | 1.250                                                            | 1.318                                                            | 1.289                                                            | 1.469                                                            |
| <i>F</i> (000)                                                                    | 1032                                                            | 1104                                                             | 1176                                                             | 1136                                                             | 1264                                                             |
| <i>μ</i> /mm <sup>−1</sup>                                                        | 0.150                                                           | 1.270                                                            | 1.007                                                            | 0.480                                                            | 3.905                                                            |
| <i>λ</i> /Å                                                                       | 0.71073                                                         | 0.71073                                                          | 0.71073                                                          | 0.71073                                                          | 0.71073                                                          |
| reflns collected/unique                                                           | 17469/3979                                                      | 21446/4899                                                       | 22176/5061                                                       | 18406/4671                                                       | 22069/5006                                                       |
| <i>R</i> <sub>1</sub> ( <i>F</i> <sub>o</sub> ) <sup><i>a</i></sup>               | 0.1341                                                          | 0.0853                                                           | 0.0691                                                           | 0.0832                                                           | 0.0495                                                           |
| <i>wR</i> <sub>2</sub> ( <i>F</i> <sub>o</sub> <sup>2</sup> ) <sup><i>b</i></sup> | 0.3577                                                          | 0.2410                                                           | 0.2048                                                           | 0.2090                                                           | 0.1190                                                           |
| <i>R</i> <sub>int</sub>                                                           | 0.0494                                                          | 0.0526                                                           | 0.0485                                                           | 0.0639                                                           | 0.0505                                                           |

<sup>*a*</sup> *R*<sub>1</sub> =  $\sum ||F_o| - |F_c|| / \sum |F_o|$  for *I* > 2σ(*I*). <sup>*b*</sup> *wR*<sub>2</sub> =  $\{\sum [w(F_o^2 - F_c^2)^2] / \sum [w(F_o^2)^2]\}^{1/2}$  for *I* > 2σ(*I*).

Table S3      Summary of geometrical parameters related to overlapped alkyl chain lengths in the  $C_x\text{MImPF}_6$  ( $x = 12, 14$ , and  $18$ ) crystal structures.

|                                                                                                                                                                | $x = 12$ ( $-150\text{ }^\circ\text{C}$ ) | $x = 14$ ( $-98\text{ }^\circ\text{C}$ ) | $x = 18$ ( $-100\text{ }^\circ\text{C}$ ) |
|----------------------------------------------------------------------------------------------------------------------------------------------------------------|-------------------------------------------|------------------------------------------|-------------------------------------------|
| $l_{\text{N1-C}_{\text{terminal}}}$ (= bond length of $\text{N1-C}_{\text{terminal}}$ ) / $\text{\AA}^a$                                                       | 14.302                                    | 16.848                                   | 21.945                                    |
| $l_{\text{C}_{\text{terminal}}'\text{-N1}}$ (= bond length of $\text{C}_{\text{terminal}}'\text{-N1}'$ ) / $\text{\AA}$                                        | 5.364                                     | 5.416                                    | 5.425                                     |
| $\alpha_{\text{N1-C}_{\text{terminal}}\text{-N1}'}$ (= bond angle of $\text{N1-C}_{\text{terminal}}\text{-N1}'$ ) / $^\circ$                                   | 104.63                                    | 104.45                                   | 104.18                                    |
| $\alpha_{\text{C}_{\text{terminal}}\text{-N1-C}_{\text{terminal}}'}$ (= bond angle of $\text{C}_{\text{terminal}}\text{-N1-C}_{\text{terminal}}'$ ) / $^\circ$ | 75.37                                     | 75.55                                    | 75.82                                     |
| $l_{\text{over}}$ (= overlapped alkyl chain length) / $\text{\AA}^b$                                                                                           | 12.947                                    | 15.497                                   | 20.616                                    |
| $l_{\text{alkyl}}$ (= alkyl chain interspacing) / $\text{\AA}^c$                                                                                               | 5.190                                     | 5.245                                    | 5.260                                     |

<sup>a</sup>  $\text{C}_{\text{terminal}}$  is the carbon atom at the end of the long alkyl chain.

<sup>b</sup> The overlapped alkyl chain length  $l_{\text{over}}$  was calculated by the following equation:  
$$l_{\text{over}} = l_{\text{N1-C}_{\text{terminal}}} - l_{\text{C}_{\text{terminal}}'\text{-N1}} \times \cos(\alpha_{\text{C}_{\text{terminal}}\text{-N1-C}_{\text{terminal}}'})$$

<sup>c</sup> The alkyl chain interspacing  $l_{\text{alkyl}}$  was calculated by the following equation:  
$$l_{\text{alkyl}} = l_{\text{C}_{\text{terminal}}'\text{-N1}} \times \sin(\alpha_{\text{C}_{\text{terminal}}\text{-N1-C}_{\text{terminal}}'})$$

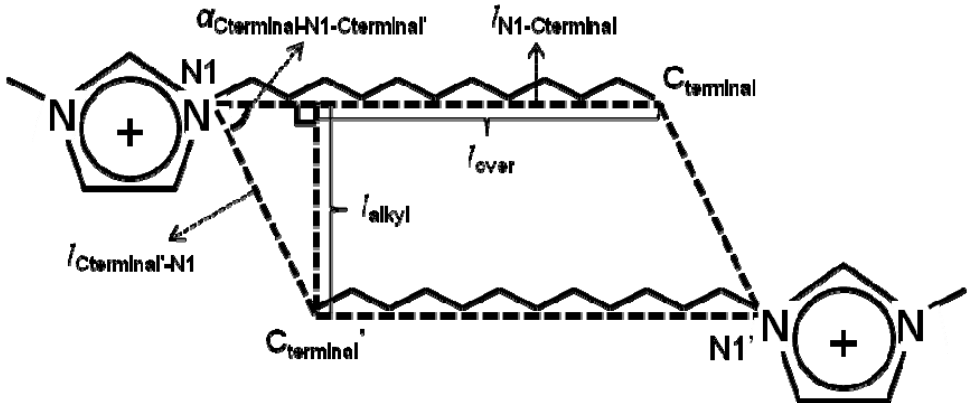

Table S4      Summary of geometrical parameters related to overlapped alkyl chain lengths for the C<sub>18</sub>MImAF<sub>6</sub> (A = P, As, Sb, Nb, and Ta)  
  
crystal structures at –100 °C.

|                                                                                           | P      | As     | Sb     | Nb     | Ta     |
|-------------------------------------------------------------------------------------------|--------|--------|--------|--------|--------|
| $l_{\text{N1-C23}}$ (= bond length of N1-C <sub>23</sub> ) / Å                            | 21.945 | 21.933 | 21.907 | 21.889 | 21.886 |
| $l_{\text{C23'-N1'}}$ (= bond length of C <sub>23</sub> '-N1') / Å                        | 5.425  | 5.443  | 5.500  | 5.490  | 5.506  |
| $\alpha_{\text{N1-C23-N1'}}$ (= bond angle of N1-C <sub>23</sub> -N1') / °                | 104.18 | 103.25 | 101.38 | 101.35 | 100.93 |
| $\alpha_{\text{C23-N1-C23'}}$ (= bond angle of C <sub>23</sub> -N1-C <sub>23</sub> ') / ° | 75.82  | 76.75  | 78.62  | 78.65  | 79.07  |
| $l_{\text{over}}$ (= overlapped alkyl chain length) / Å <sup>a</sup>                      | 20.616 | 20.685 | 20.822 | 20.809 | 20.842 |
| $l_{\text{alkyl}}$ (= alkyl chain interspacing) / Å <sup>b</sup>                          | 5.260  | 5.298  | 5.392  | 5.383  | 5.406  |
| $c \times \sin\beta$                                                                      | 28.343 | 27.985 | 25.939 | 27.069 | 26.536 |

<sup>a</sup> The overlapped alkyl chain length  $l_{\text{over}}$  was calculated by the following equation:

$$l_{\text{over}} = l_{\text{N1-C23}} - l_{\text{C23'-N1'}} \times \cos(\alpha_{\text{C23-N1-C23'}}).$$

<sup>b</sup> The alkyl chain interspacing  $l_{\text{alkyl}}$  was calculated by the following equation:

$$l_{\text{alkyl}} = l_{\text{C23'-N1'}} \times \sin(\alpha_{\text{C23-N1-C23'}}).$$

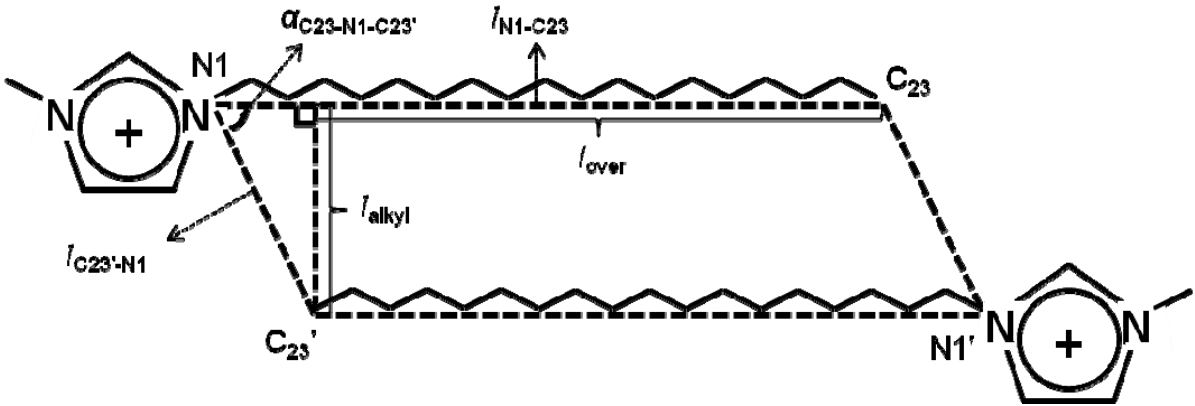

Supplement: c2dt11693f.pdf [file c2dt11693f.pdf]
